# Supplementary material for: Direct measurement of lipid-soluble arsenic species in biological samples with HPLC-ICPMS
Source: Royal Society of Chemistry journal article supplement (doi:10.1039/b502445e), 2005-01-01

Normal-phase HPLC-ICPMS chromatograms of six different fish oils. Conditions: YMC-Pack Diol 120 column (125 mm x 2.1 mm i.d., 5  $\mu\text{m}$ ); column temperature 50  $^{\circ}\text{C}$ ; injection volume 5  $\text{mm}^3$ ; flow rate 80  $\text{mm}^3 \text{min}^{-1}$ ; mobile phase A (acetone/hexane/acetic acid/triethylamine, 900+70+14+2 v/v).

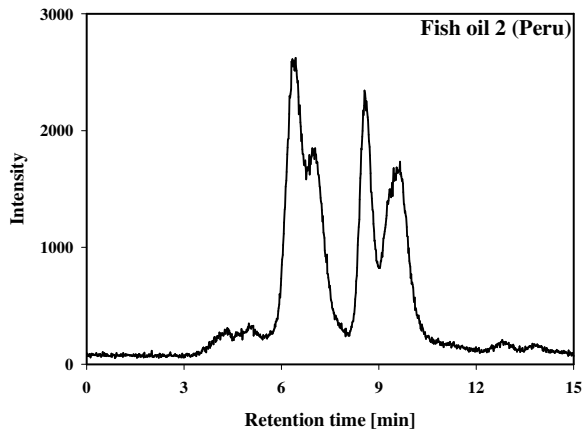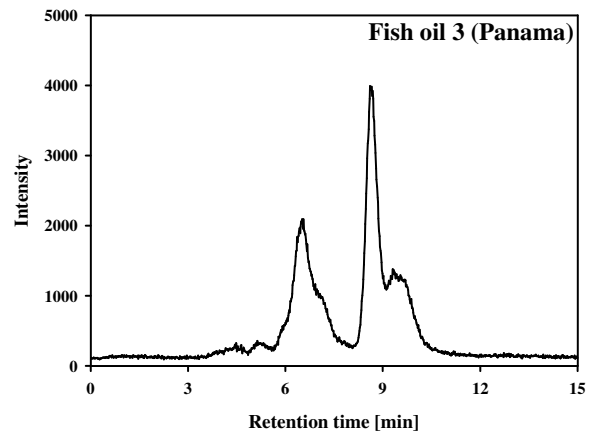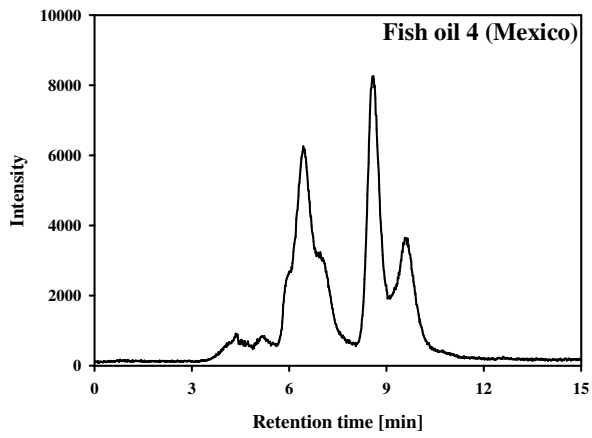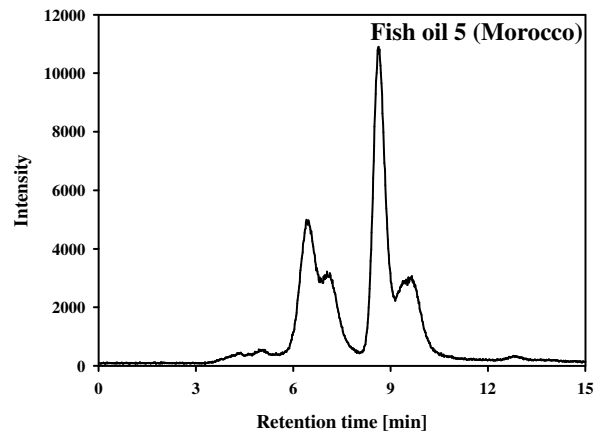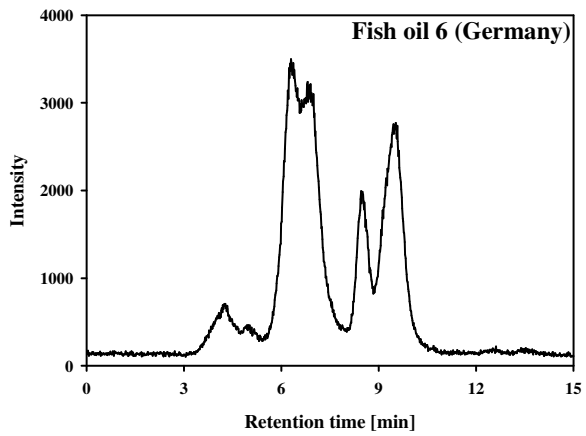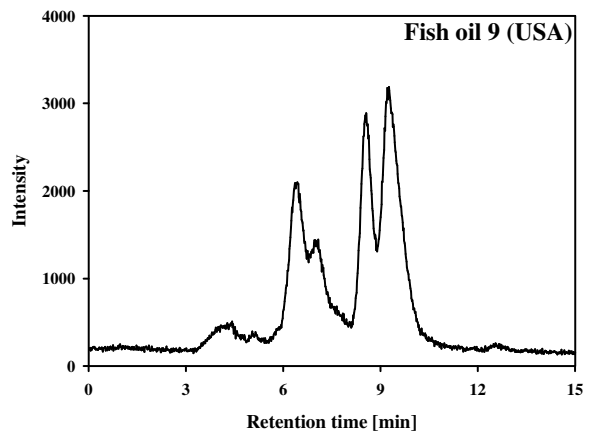

Supplement: b502445e.pdf [file b502445e.pdf]
